# Supplementary material for: Vaccination Criteria Based on Factors Influencing COVID-19 Diffusion and Mortality
Source: MDPI journal article supplement (doi:10.3390/vaccines8040766), 2020-12-15
Supplement: s1 [file s1]

## Supplementary Materials

Contingency tables.

**Tab.S1** 2x2 contingency table relative to the influence of gender on the probability of being positive to Covid-19 test. The data show that the latter probability is significantly increased for male (Chi-Square test: p-value $<10^{-3}$ ).

| \      | POSITIVE | NEGATIVE | Tot.   | Positive Probability |
|--------|----------|----------|--------|----------------------|
| FEMALE | 10773    | 153180   | 163953 | 0.066                |
| MALE   | 8139     | 97300    | 105438 | 0.078                |
| Tot.   | 18912    | 250480   | 269391 | 0.07                 |

**Tab.S2** 2x2 contingency table relative to the influence of gender on the probability of death for patients diagnosed with Covid-19 virus. The data show that the latter probability is significantly increased for male (Chi-Square test: p-value $<10^{-3}$ ).

| \      | DEATH | NO-DEATH | Tot.  | Death Probability |
|--------|-------|----------|-------|-------------------|
| FEMALE | 857   | 9916     | 10773 | 0.079             |
| MALE   | 930   | 7208     | 8139  | 0.11              |
| Tot.   | 1787  | 17124    | 18912 | 0.094             |

**Tab.S3** 2x2 contingency table relative to the influence on the probability of death of environment where patients are during their disease (Covid-19 virus). The table here concerns not being admitted in ICU and of age over 60. The probability of death is significantly increased for patient being in hospital/medical structure, with respect of being in elderly house (Chi-Square test: p-value $<10^{-3}$ ).

| (NO-INTENSIVE CARE, over 60) | DEATH | NO-DEATH | Tot. | Death Probability |
|------------------------------|-------|----------|------|-------------------|
| HOSPITAL / MEDICAL STRUCT.   | 659   | 2097     | 2756 | 0.239             |
| ELDERLY HOUSE                | 350   | 2175     | 2525 | 0.139             |
| Tot.                         | 1009  | 4272     | 5281 | 0.191             |

**Tab.S4** 2x2 contingency table relative to the influence on the probability of death of environment where patients are during their disease (Covid-19 virus). The table h**Tab.S5** 2x2 contingency table relative to the influence on the probability of death of environment where patients are during their disease (Covid-19 virus). The probability of death is significantly increased by a factor 4-5 for patients being admitted in ICU (Chi-Square test: p-value $<10^{-3}$ ).

| (NO-INTENSIVE CARE, under 60) | DEATH | NO-DEATH | Tot. | Death Probability |
|-------------------------------|-------|----------|------|-------------------|
| HOSPITAL / MEDICAL STRUCT.    | 19    | 1141     | 1160 | 0.016             |
| HOME                          | 8     | 8514     | 8522 | 0.0009            |
| Tot.                          | 27    | 9655     | 9682 | 0.003             |

**Tab.S5** 2x2 contingency table relative to the influence on the probability of death of environment where patients are during their disease (Covid-19 virus). The probability of death is significantly increased by a factor 4-5 for patients being admitted in ICU (Chi-Square test: p-value $<10^{-3}$ ).

| \                 | DEATH | NO-DEATH | Tot.  | Death Probability |
|-------------------|-------|----------|-------|-------------------|
| INTENSIVE CARE    | 311   | 499      | 810   | 0.384             |
| NO-INTENSIVE CARE | 1476  | 16626    | 18102 | 0.081             |
| Tot.              | 1787  | 17125    | 18912 | 0.094             |

**Tab.S6** 2x2 contingency table relative to the influence on the probability of death of environment where patients are during their disease (Covid-19 virus). The table here concerns patients of age under 60. The probability of death is significantly increased by a factor  $\approx 60$  for patients being admitted in ICU (Chi-Square test: p-value $<10^{-3}$ ).

| (under 60)        | DEATH | NO-DEATH | Tot. | Death Probability |
|-------------------|-------|----------|------|-------------------|
| INTENSIVE CARE    | 40    | 184      | 224  | 0.178             |
| NO-INTENSIVE CARE | 27    | 9655     | 9682 | 0.003             |
| Tot.              | 67    | 9839     | 9906 | 0.007             |

**Tab.S7** 2x2 contingency table relative to the influence on the probability of death of environment where patients are during their disease (Covid-19 virus). The table here concerns patients of age over 60. The probability of death is significantly increased by a factor 2-3 for patients being admitted in ICU (Chi-Square test:  $p\text{-value} < 10^{-3}$ ).

| (over 60)         | DEATH | NO-DEATH | Tot. | Death Probability |
|-------------------|-------|----------|------|-------------------|
| INTENSIVE CARE    | 271   | 315      | 586  | 0.462             |
| NO-INTENSIVE CARE | 1449  | 6971     | 8420 | 0.172             |
| Tot.              | 1720  | 7286     | 9006 | 0.191             |

**Tab.S8** Contingency table relative to the influence of the number of comorbidities on the probability of death for all Covid-19 diagnosed patients. The increase of probability with the number of comorbidities, as seen in the last column, is statistically significant (Chi-Square test:  $p\text{-value} < 10^{-3}$ ).

| \                      | DEATH | NO-DEATH | Tot.  | Death Probability |
|------------------------|-------|----------|-------|-------------------|
| NO COMORBIDITY         | 564   | 8582     | 9146  | 0.062             |
| 1 COMORBIDITY          | 382   | 4569     | 4951  | 0.08              |
| 2 COMORBIDITIES        | 413   | 2519     | 2932  | 0.14              |
| 3 COMORBIDITIES        | 257   | 1058     | 1315  | 0.19              |
| 4 COMORBIDITIES        | 130   | 311      | 441   | 0.29              |
| $\geq 5$ COMORBIDITIES | 41    | 86       | 127   | 0.32              |
| Tot.                   | 1787  | 17125    | 18912 | 0.094             |

**Tab.S9** Contingency table relative to the influence on the probability of death of the number of comorbidities, for Covid-19 diagnosed patients. The table here concerns being admitted in ICU. The increase of probability with the number of comorbidities, as seen in the last column, is statistically non-significant, as obtained by the Chi-Square test.

| (Intensive Care)       | DEATH | NO-DEATH | Tot. | Death Probability |
|------------------------|-------|----------|------|-------------------|
| NO COMORBIDITY         | 92    | 123      | 215  | 0.43              |
| 1 COMORBIDITY          | 78    | 139      | 217  | 0.36              |
| 2 COMORBIDITIES        | 71    | 137      | 208  | 0.34              |
| 3 COMORBIDITIES        | 43    | 67       | 110  | 0.39              |
| 4 COMORBIDITIES        | 20    | 17       | 37   | 0.54              |
| $\geq 5$ COMORBIDITIES | 7     | 16       | 23   | 0.3               |
| Tot.                   | 311   | 499      | 810  | 0.38              |

**Tab.S10** Contingency table relative to the influence on the probability of death of the number of comorbidities, for Covid-19 diagnosed patients. The table here concerns not being admitted in ICU. The increase of probability with the number of comorbidities, as seen in the last column, is statistically significant (Chi-Square test:  $p\text{-value} < 10^{-3}$ ).

| (NO-Intensive Care)    | DEATH | NO-DEATH | Tot.  | Death Probability |
|------------------------|-------|----------|-------|-------------------|
| NO COMORBIDITY         | 472   | 8459     | 8931  | 0.05              |
| 1 COMORBIDITY          | 304   | 4430     | 4734  | 0.06              |
| 2 COMORBIDITIES        | 342   | 2382     | 2724  | 0.13              |
| 3 COMORBIDITIES        | 214   | 991      | 1205  | 0.18              |
| 4 COMORBIDITIES        | 110   | 294      | 404   | 0.27              |
| $\geq 5$ COMORBIDITIES | 34    | 70       | 104   | 0.33              |
| Tot.                   | 1476  | 16626    | 18102 | 0.08              |

**Tab.S11** 2x2 contingency table relative to the influence on the probability of being admitted in ICU. The table here concerns patients of age under 60, with no comorbidity. The probability of death is significantly increased for patients admitted in ICU (Chi-Square test:  $p\text{-value} < 10^{-3}$ ).

| (under 60, NO COMORBIDITY) | DEATH | NO-DEATH | Tot. | Death Probability |
|----------------------------|-------|----------|------|-------------------|
| INTENSIVE CARE             | 13    | 77       | 90   | 0.14              |
| NO-INTENSIVE CARE          | 5     | 6834     | 6839 | 0.0007            |
| Tot.                       | 18    | 6911     | 6929 | 0.0026            |
